# Supplementary material for: Analysis of CircRNA Expression in Peripheral Blood of Holstein Cows in Response to Heat Stress
Source: MDPI journal article supplement (doi:10.3390/ijms241210150), 2023-06-15
Supplement: s1 [file s1]

**Supplementary files 10 Composition and nutrient levels of basal diets**

| <b>Ingredient</b>                                   | <b>Dry matter basis (%)</b> |
|-----------------------------------------------------|-----------------------------|
| Corn grain                                          | 28.70                       |
| Wheat bran                                          | 5.30                        |
| Soybean meal                                        | 6.40                        |
| Cottonseed meal                                     | 8.00                        |
| Chinese wild rye                                    | 25.00                       |
| Alfalfa hay                                         | 25.00                       |
| Calcium hydrogen phosphate                          | 0.55                        |
| Mineral and vitamin premix <sup>1</sup>             | 0.50                        |
| Salt                                                | 0.55                        |
| <b>Nutrient composition</b>                         | <b>Dry matter basis (%)</b> |
| NE <sub>L</sub> (MJ·kg <sup>-1</sup> ) <sup>2</sup> | 6.48 MJ·kg <sup>-1</sup>    |
| Crude protein                                       | 15.40                       |
| Neutral detergent fiber                             | 39.60                       |
| Acid detergent fiber                                | 21.70                       |
| Ca                                                  | 0.80                        |
| P                                                   | 0.46                        |

Note: <sup>1</sup> Contained (per kilogram) vitamin A  $9.5 \times 10^5$  IU, vitamin D  $4 \times 10^4$  IU, vitamin E  $7.5 \times 10^3$  IU, Fe  $3 \times 10^3$  mg, Cu  $2 \times 10^3$  mg/kg, Mn  $2.5 \times 10^3$  mg, Zn  $8 \times 10^3$  mg, Co 20 mg, I 2100 mg and Se 60 mg. <sup>2</sup> NE<sub>L</sub> is calculated based on the composition of raw materials. The rest are measured values.
