# Supplementary material for: Analysis of CircRNA Expression in Peripheral Blood of Holstein Cows in Response to Heat Stress
Source: MDPI journal article supplement (doi:10.3390/ijms241210150), 2023-06-15
Supplement: s1 [file s1]

| Accession    | Source gene        | Sum1 vs Spr1                   |            |            | Sum1 vs Spr2                   |            |             |
|--------------|--------------------|--------------------------------|------------|------------|--------------------------------|------------|-------------|
|              |                    | log <sub>2</sub> (Fold Change) | regulation | p-value    | log <sub>2</sub> (Fold Change) | regulation | p-value     |
| circRNA27512 | ASPH               | inf                            | up         | 0.00000020 | inf                            | up         | 0.00000019  |
| circRNA4902  | NRDC               | -inf                           | down       | 0.00000045 | -inf                           | down       | 0.000065071 |
| circRNA10995 | PHF21A             | -inf                           | down       | 0.00019047 | -inf                           | down       | 0.00019583  |
| circRNA14518 | TXNDC16            | -inf                           | down       | 0.00160854 | -inf                           | down       | 0.00007698  |
| circRNA5456  | ATP2C1             | -inf                           | down       | 0.00223572 | -inf                           | down       | 0.01251287  |
| circRNA15594 | THADA              | -inf                           | down       | 0.00562197 | inf                            | up         | 0.00706730  |
| circRNA27332 | RALGPS2            | inf                            | up         | 0.00832166 | inf                            | up         | 0.00706730  |
| circRNA4205  | NR3C1              | -inf                           | down       | 0.01468864 | -inf                           | down       | 0.00001445  |
| circRNA10586 | TMBIM4             | -inf                           | down       | 0.01473002 | -inf                           | down       | 0.02690126  |
| circRNA27437 | PPHLN1             | inf                            | up         | 0.01656765 | inf                            | up         | 0.016459023 |
| ciRNA292     | RUNX2              | -inf                           | down       | 0.01784709 | -inf                           | down       | 0.00337421  |
| circRNA27346 | UTRN               | inf                            | up         | 0.03012005 | inf                            | up         | 0.02900293  |
| circRNA27436 | TOX                | inf                            | up         | 0.03165165 | inf                            | up         | 0.02780933  |
| circRNA11103 | STAM2              | -inf                           | down       | 0.03274586 | -inf                           | down       | 0.03079113  |
| circRNA5135  | RAPGEF2            | -inf                           | down       | 0.03818905 | -inf                           | down       | 0.03404894  |
| circRNA7726  | DNAH12             | 2.0048627                      | up         | 0.03838692 | 2.8454457                      | up         | 0.04137403  |
| ciRNA3301    | WVOX               | inf                            | up         | 0.04618363 | inf                            | up         | 0.04168654  |
| circRNA27501 | ZFYVE16            | inf                            | up         | 0.04699043 | inf                            | up         | 0.04293164  |
| circRNA4661  | intergenic_circRNA | -inf                           | down       | 0.00029191 | -inf                           | down       | 0.00004687  |
| circRNA4775  | intergenic_circRNA | -inf                           | down       | 0.00032880 | -inf                           | down       | 0.00018568  |

|                  |                        |               |      |                |               |      |                |
|------------------|------------------------|---------------|------|----------------|---------------|------|----------------|
| circRNA219<br>1  | PAPOLA                 | -inf          | down | 0.0016<br>5264 | -inf          | down | 0.007253<br>36 |
| circRNA278<br>14 | STXBP4                 | inf           | up   | 0.0033<br>4190 | inf           | up   | 0.003024<br>13 |
| circRNA147<br>80 | USP34                  | 4.996849<br>3 | up   | 0.0036<br>1965 | 2.711971<br>3 | up   | 0.021601<br>51 |
| circRNA479<br>4  | intergenic_circR<br>NA | -inf          | down | 0.0069<br>3102 | -inf          | down | 0.010374<br>51 |
| circRNA134<br>93 | RHEB                   | -inf          | down | 0.0096<br>0183 | -inf          | down | 0.037356<br>67 |
| circRNA278<br>60 | ANKRD27                | inf           | up   | 0.0120<br>3971 | inf           | up   | 0.011061<br>26 |
| circRNA218<br>30 | DIAPH3                 | inf           | up   | 0.0134<br>7447 | 3.503019<br>1 | up   | 0.041496<br>89 |
| circRNA362<br>8  | MCF2L2                 | -inf          | down | 0.0171<br>5318 | -inf          | down | 0.033509<br>48 |
| circRNA143<br>20 | intergenic_circR<br>NA | 3.873425<br>1 | up   | 0.0297<br>4030 | 6.025248<br>8 | up   | 0.013016<br>67 |
| circRNA296<br>05 | ADAM19                 | inf           | up   | 0.0338<br>5933 | inf           | up   | 0.033410<br>00 |
| circRNA271<br>83 | DOCK7                  | inf           | up   | 0.0341<br>3498 | inf           | up   | 0.030610<br>35 |
| circRNA460<br>3  | intergenic_circR<br>NA | -inf          | down | 0.0355<br>7018 | -inf          | down | 0.005931<br>66 |
| circRNA567<br>7  | GPCPD1                 | -inf          | down | 0.0401<br>8036 | -inf          | down | 0.024181<br>85 |
| circRNA267<br>16 | YTHDC2                 | inf           | up   | 0.0457<br>3028 | inf           | up   | 0.046019<br>07 |

Inf: circRNA was not expressed in either the Spr or the Sum.

| GO Term                                    | circRNAs (Source Gene)                                                                        |
|--------------------------------------------|-----------------------------------------------------------------------------------------------|
| Guanyl-nucleotide exchange factor activity | circRNA27860 (ANKRD27); circRNA27332 (RALGPS2);<br>circRNA3628 (MCF2L2); circRNA27183 (DOCK7) |
| Small GTPase mediated signal transduction  | circRNA27332 (RALGPS2); circRNA13493 (RHEB);<br>circRNA27183 (DOCK7)                          |
| Repressing transcription factor binding    | ciRNA292 (RUNX2); circRNA4205 (NR3C1);<br>circRNA27437 (PPHLN1); circRNA4205 (NR3C1);         |
| Cytosol                                    | circRNA11103 (STAM2); circRNA13493 (RHEB);<br>ciRNA3301 (WWOX)                                |
| KEGG Term                                  | circRNAs (Source Gene)                                                                        |
| Choline metabolism in cancer               | circRNA13493 (RHEB); circRNA5677 (GPCPD1)                                                     |
| Endocytosis                                | circRNA11103 (STAM2);<br>circRNA27501 (ZFYVE16)                                               |
| Longevity regulating pathway               | circRNA13493 (RHEB)                                                                           |
